# Supplementary material for: Downregulation of ubiquitin inhibits the proliferation and radioresistance of non-small cell lung cancer cells in vitro and in vivo
Source: PubMed Central journal article supplement (PMC4377628; doi:10.1038/srep09476), 2015-03-30
Supplement: srep09476-s1.pdf [file srep09476-s1.pdf]

## Supplemental information

Title: Downregulation of ubiquitin inhibits the proliferation and radioresistance of non-small cell lung cancer cells *in vitro* and *in vivo*

By: Yiting Tang, Yangyang Geng, Judong Luo, Wenhao Shen, Wei Zhu, Cuicui Meng, Ming Li, Xifa Zhou, Shuyu Zhang, Jianping Cao

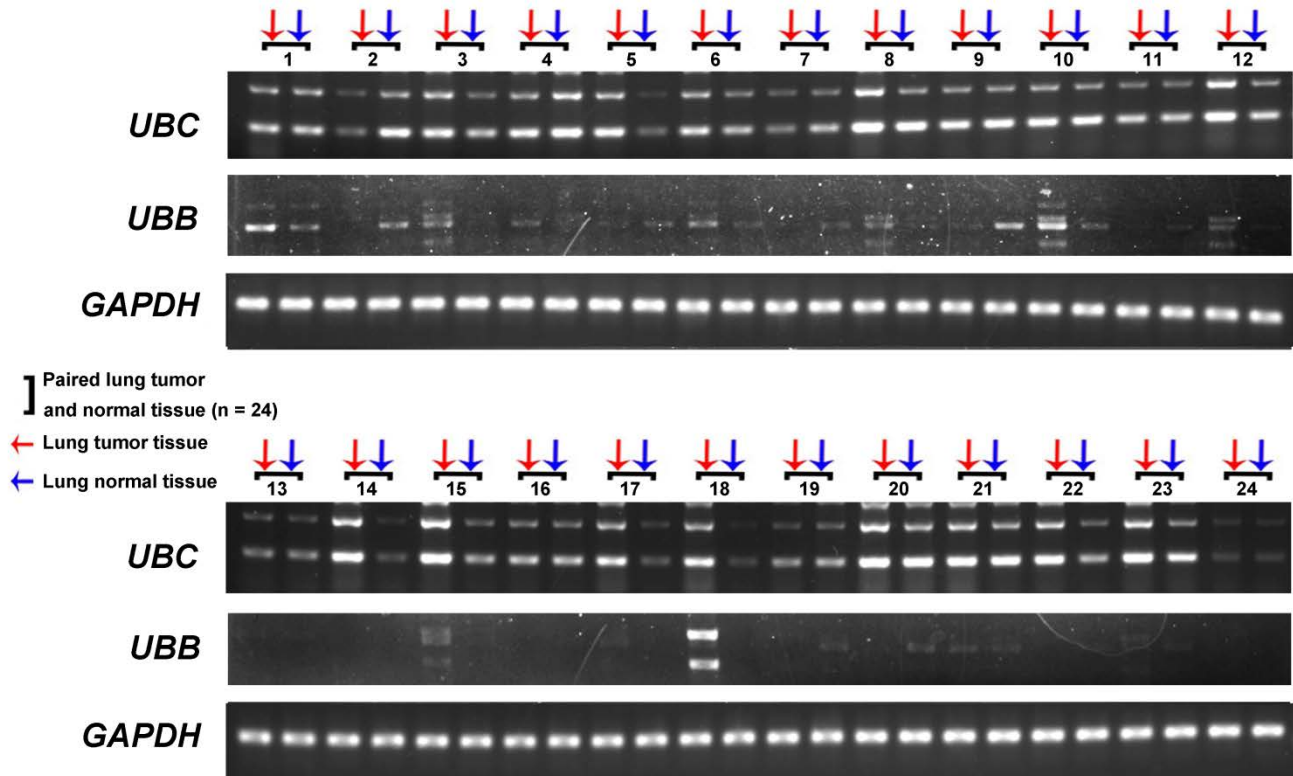

Supplemental Figure 1

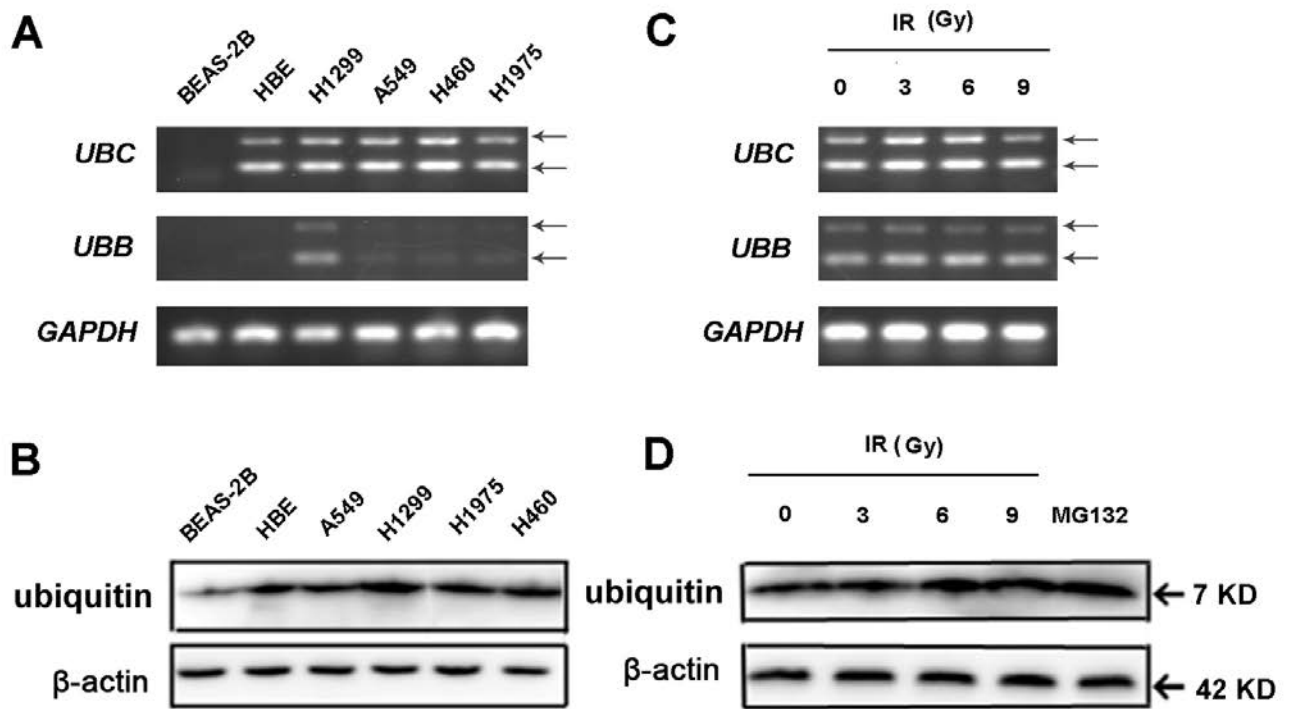

Supplemental Figure 2

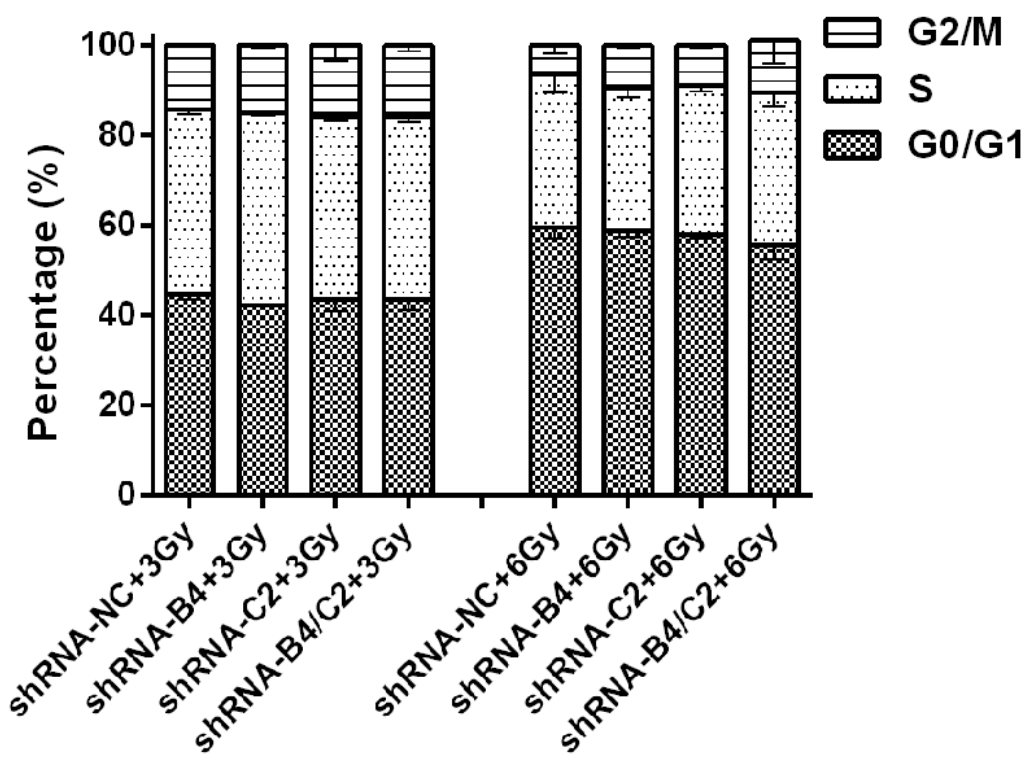

Supplemental Figure 3

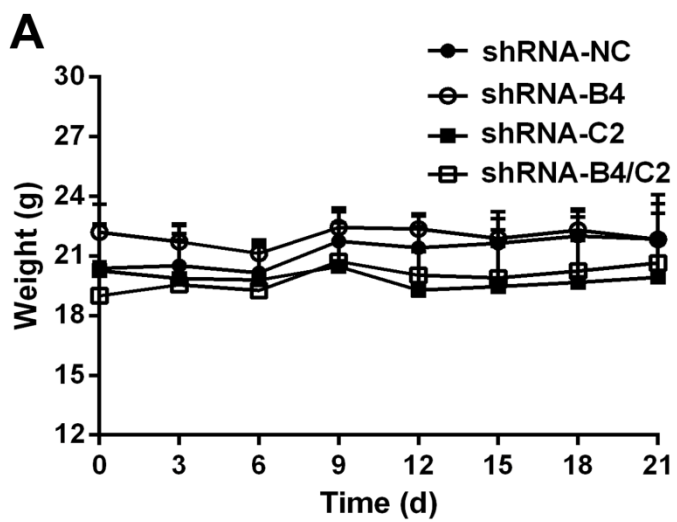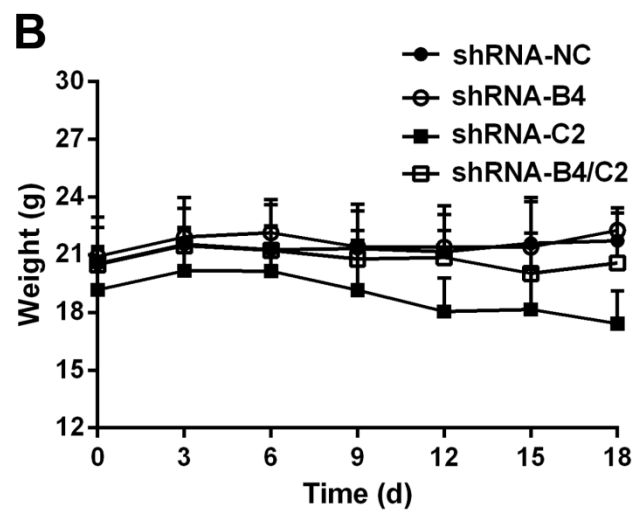

Supplemental Figure 4

**Supplemental Table 1 Information of lung cancer patients**

| <b>Variables</b> | <b>Subgroup</b>              | <b>Grade I</b> | <b>Grade II</b> | <b>Grade III</b> | <b>Total</b> |
|------------------|------------------------------|----------------|-----------------|------------------|--------------|
| Gender           | Male                         | 3              | 34              | 5                | 42 (64.62%)  |
|                  | Female                       | 5              | 13              | 5                | 23 (35.38%)  |
| Age              | Average Age                  | 60             | 54.5            | 56.9             | 58.6         |
|                  | Age Range                    | 55-69          | 45-78           | 32-75            | 32-78        |
| Histological     | Adenocarcinoma               | 0              | 25              | 5                | 30 (46.15%)  |
|                  | Squamous carcinoma           | 3              | 22              | 5                | 30 (46.15%)  |
| Features         | Bronchioloalveolar carcinoma | 5              | 0               | 0                | 5 (7.70%)    |

**Supplemental Table 2 Targeting sequences for shRNAs**

| <b>Name</b> | <b>Sequence</b>                 | <b>Location</b> |
|-------------|---------------------------------|-----------------|
| shRNA-NC    | 5'-GTTCTCCGAACGTG-3'            |                 |
| shRNA-B3    | 5'-TGGGCACTGCGAATGCCATGACTGA-3' | 3-28            |
| shRNA-B4    | 5'-AATGGCTATAGTGCAGAGTAATGCC-3' | 4-29            |
| shRNA-B364  | 5'-GGTATGCAGATCTTCGTGAAG-3'     | 364-385         |
| shRNA-B675  | 5'-GGCCAAGATCCAAGATAAAGA-3'     | 675-696         |
| shRNA-C187  | 5'-GTCATAAGACTCGGCCTTAG-3'      | 187-208         |
| shRNA-C1138 | 5'-CTGATCAGCAGAGGTTGATCT-3'     | 1138--1159      |
| shRNA-C409  | 5'-GATTTGGGTTCGAGTTCTTGT-3'     | 409-430         |
| shRNA-C345  | 5'-GGTGAACGCCGATGATTATAT-3'     | 345-366         |

**Supplemental Table 3 Primers for RT-PCR analysis**

| <b>gene</b>  | <b>Forward</b>             | <b>Reverse</b>              |
|--------------|----------------------------|-----------------------------|
| <i>UBB</i>   | 5'-TGTGGTTTCTGGAAGCCTTT-3' | 5'-GCTTGCCTGCAAAGATGAG-3'   |
| <i>UBC</i>   | 5'-GGGTCGCAGTTCTTGTGGT-3'  | 5'-TCCAGCAAAGATCAGCCTCT-3'  |
| <i>GAPDH</i> | 5'-GCACCGTCAAGGCTGAGAAC-3' | 5'-GGATCTCGCTCCTGGAAGATG-3' |

## Figure legends

**Supplementary Figure 1** The expression level of *UBB* and *UBC* mRNA in 24 paired lung cancer tissue and corresponding normal tissue samples. RT-PCR was used to analyze the relative *UBB* and *UBC* mRNA level.

**Supplementary Figure 2** Ubiquitin mRNA and protein expression in cell lines. (A) RT-PCR and (B) Western blot analysis of the expression of *UBB*, *UBC* gene and ubiquitin protein expression in human lung cancer cell lines (H1299, A549, H460 and H1975) and normal bronchial epithelial cell lines (BEAS-2B and HBE). (C) RT-PCR and (D) Western blot analysis of the expression of *UBB*, *UBC* gene and ubiquitin protein expression in H1299 cells after 0, 3, 6 or 9 Gy X-ray irradiation. Arrows indicate the amplification product of tandem repeat sequence of ubiquitin coding genes.

**Supplementary Figure 3** Cell cycle distribution after ubiquitin knock-down combined with irradiation in H1299 cells.

**Supplementary Figure 4** (A) Body weights of ubiquitin knockdown. (B) Body weights of ubiquitin knockdown plus irradiation. Body weights were determined every three day. Data are presented as the means  $\pm$  SEM (\*  $P < 0.05$ ).

**Supplemental Table 1** Targeting sequences for shRNAs

**Supplemental Table 2** Primers for RT-PCR analysis

**Supplemental Table 3** Information of non-small cell lung cancer patients



Additional supplemental information (uncropped blots)

Apoptosis

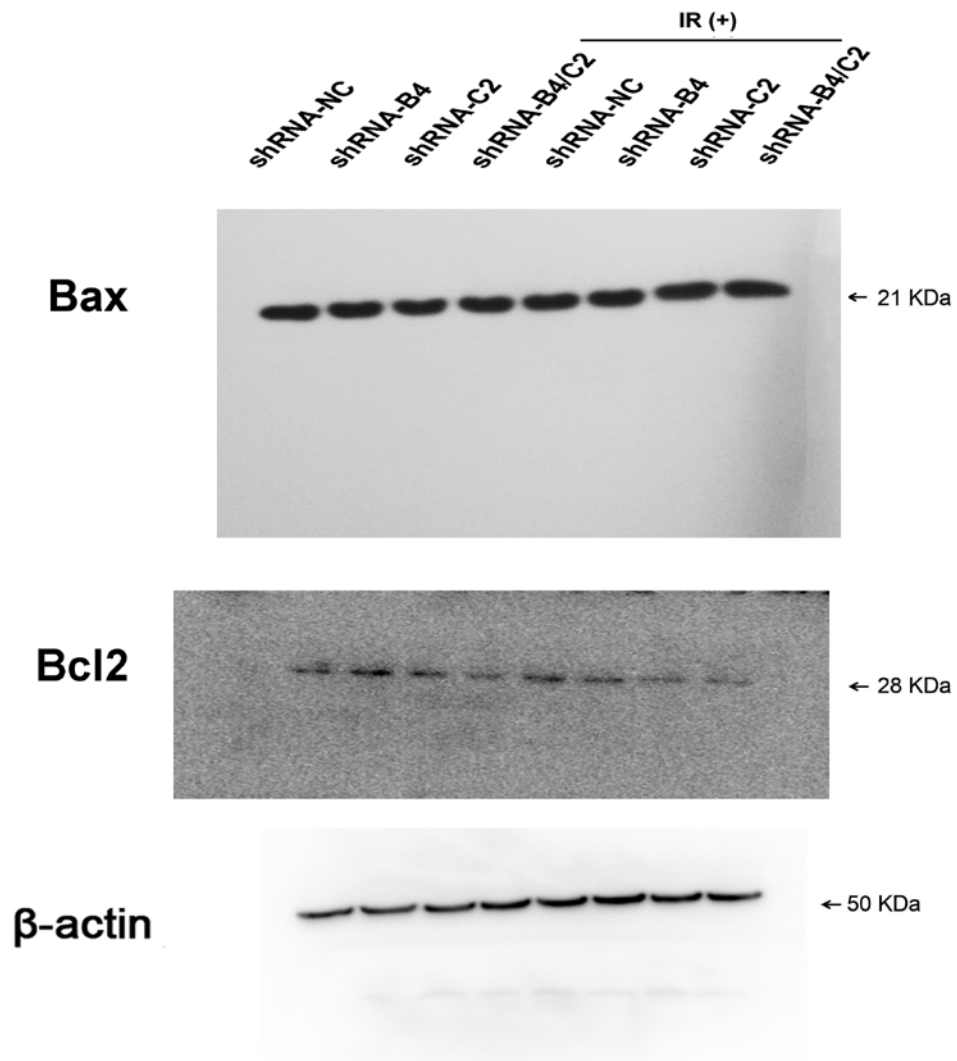

Supplemental Figure 4. Western blot analyze the apoptosis related protein Bcl<sub>2</sub> and Bax.

Cytoplasm protein Western blot

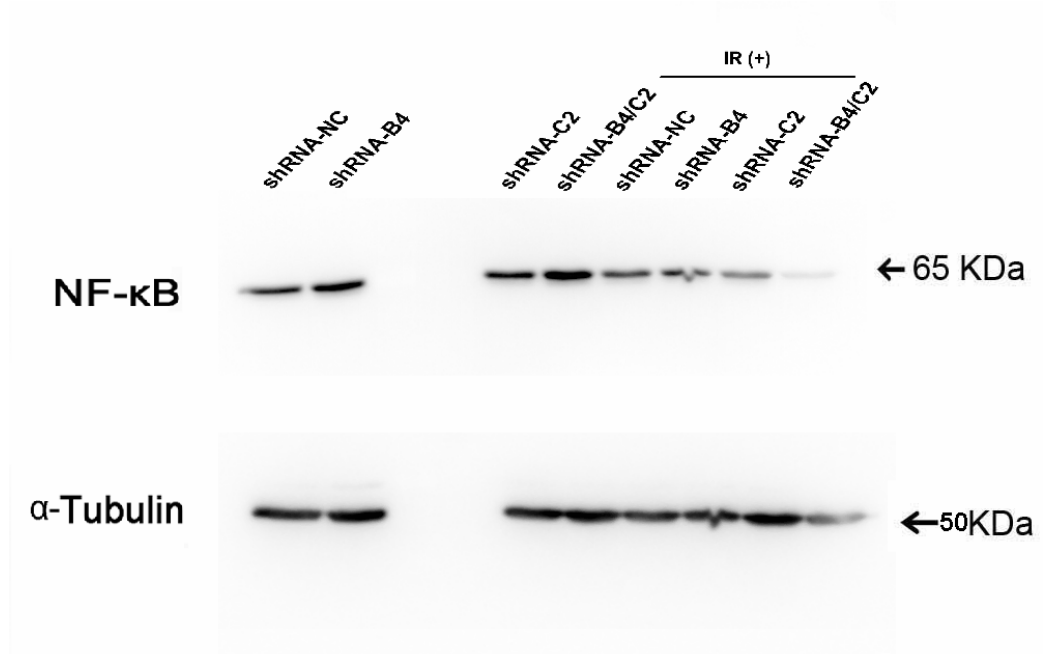

Nucleus Protein Western blot

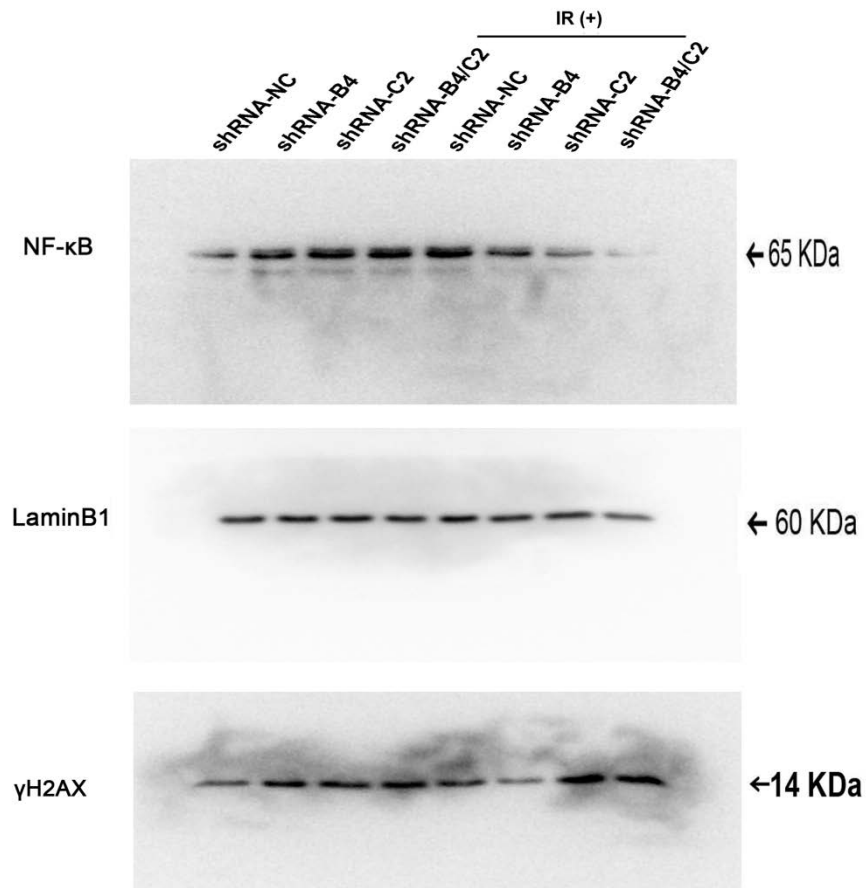

**Supplemental Figure 5.** Western blot analyze the NF-κB translocate and γH2AX expression

**In Vitro**

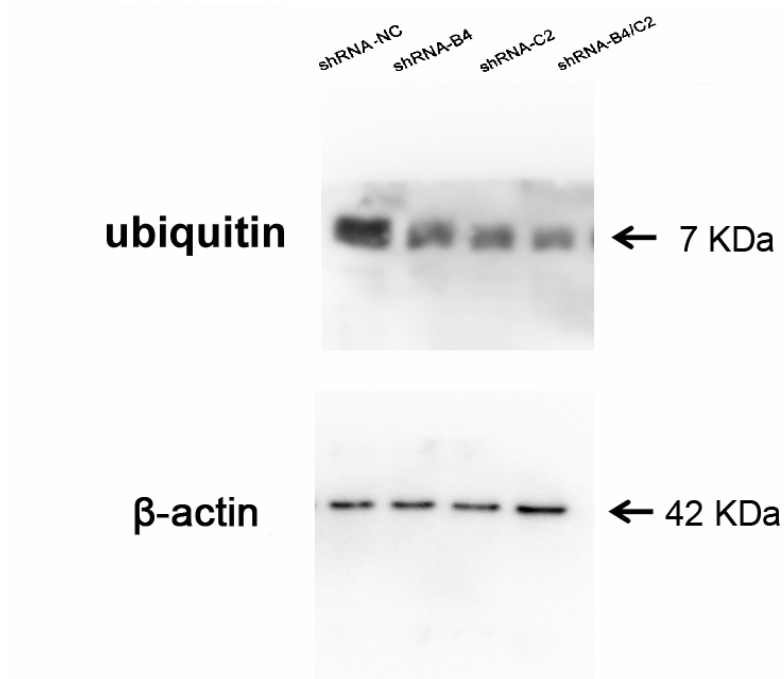

**In Vivo**

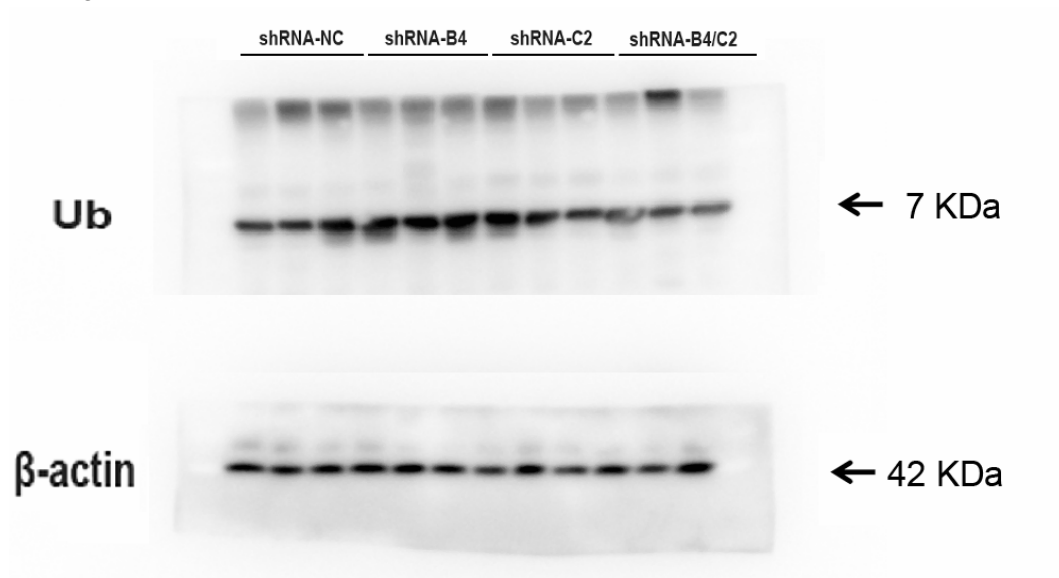

**Supplemental Figure 6.** Western blot analysis of the shRNA targeting ubiquitin both *in vitro* and *in vivo*

**AKT-CyclinD1 pathway**

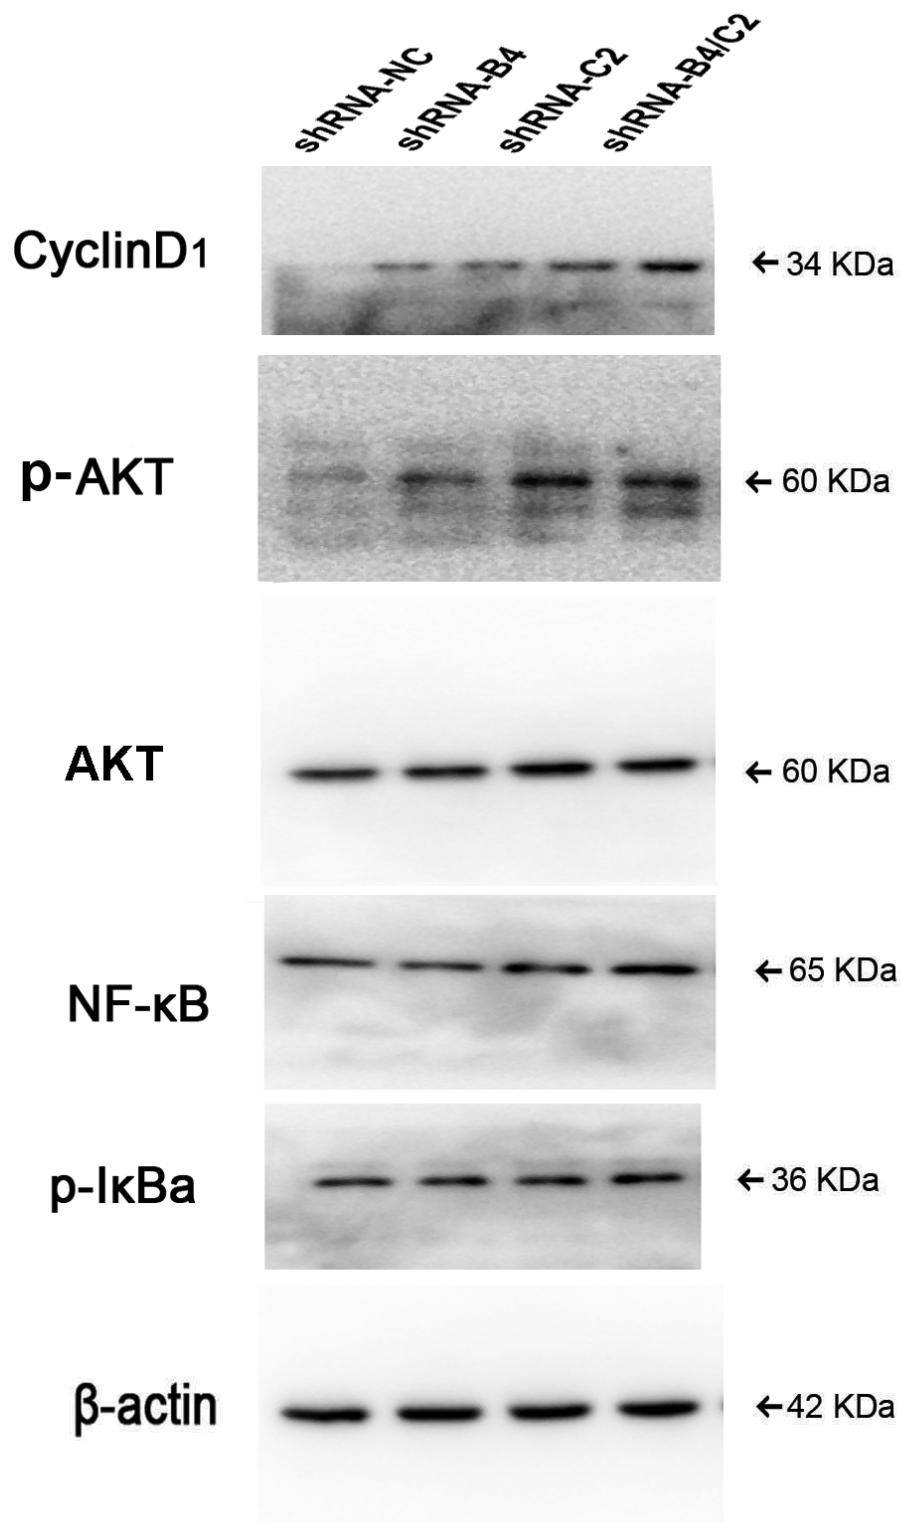

**Supplemental Figure 7.** ubiquitin inhibition affect the cyclin D1 and phosphor-AKT expression

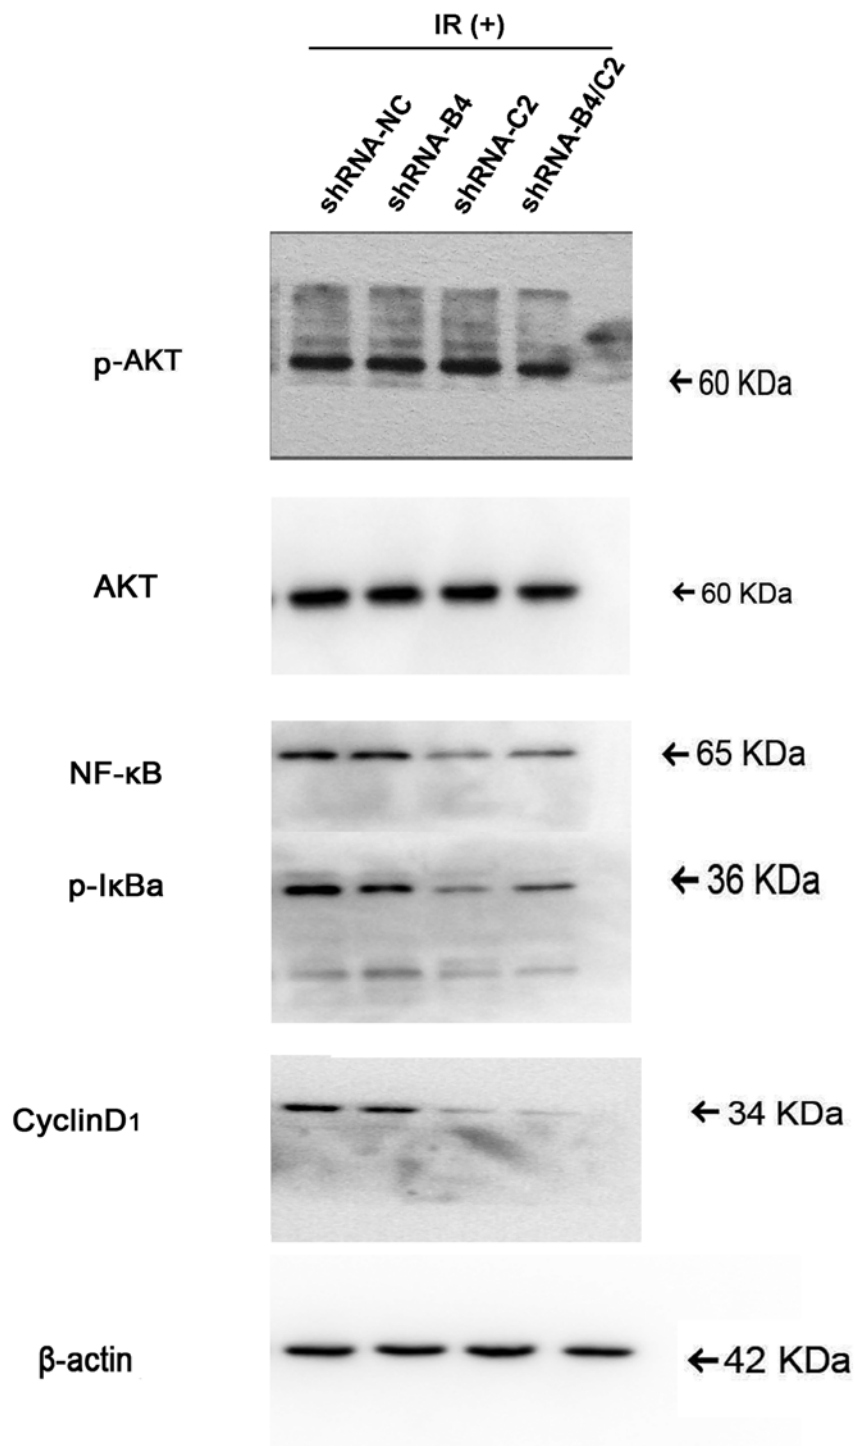

**Supplemental Figure 8.** Knock-down of ubiquitin affected AKT activation and inhibited NF-κB translocation induced by X-ray irradiation.
